1 **Influence of hyaluronic acid transitions in tumor microenvironment**  
2 **on glioblastoma malignancy and invasive behavior**

3  
4 Jee-Wei E Chen<sup>1</sup>, Sara Pedron<sup>2</sup>, Peter Shyu<sup>3</sup>, Yuhang Hu<sup>3</sup>, Jann N Sarkaria<sup>4</sup>, Brendan A C  
5 Harley<sup>1,2\*</sup>

6  
7 <sup>1</sup> Department of Chemical & Biomolecular Engineering, University of Illinois at Urbana-  
8 Champaign, Urbana, IL, USA

9 <sup>2</sup> Carl R. Woese Institute for Genomic Biology, University of Illinois at Urbana-Champaign,  
10 Urbana, IL, USA

11 <sup>3</sup> Department of Mechanical Science and Engineering, University of Illinois at Urbana-  
12 Champaign, Urbana, USA

13 <sup>4</sup> Department of Radiation Oncology, Mayo Clinic, Rochester, MN, USA  
14

15

16 **\* Correspondence:**

17 Prof. Brendan A.C. Harley

18 Dept. of Chemical and Biomolecular Engineering

19 Carl R. Woese Institute for Genomic Biology

20 University of Illinois at Urbana-Champaign

21 110 Roger Adams Laboratory

22 600 S. Mathews Ave.

23 Urbana, IL 61801

24 Phone: (217) 244-7112

25 Fax: (217) 333-5052

26 e-mail: [bharley@illinois.edu](mailto:bharley@illinois.edu)  
27

28

29 **Keywords:** cell invasion, hyaluronic acid, hydrogels, tumor microenvironment, tumor margins,  
30 molecular weight, glioblastoma, brain tumor

31 **Running Head:** Hyaluronan in brain tumor invasiveness

## 32 **Abstract**

33 The extracellular matrix (ECM) is critical in tumor growth and invasive potential of cancer cells.  
34 In glioblastoma tumors, some components of the native brain ECM such as hyaluronic acid (HA)  
35 have been suggested as key regulators of processes associated with poor patient outlook such as  
36 invasion and therapeutic resistance. Given the importance of cell-mediated remodeling during  
37 invasion, it is likely that the molecular weight of available HA polymer may strongly influence  
38 GBM progression. Biomaterial platforms therefore provide a unique opportunity to  
39 systematically examine the influence of the molecular weight distribution of HA on GBM cell  
40 activity. Here we report the relationship between the molecular weight of matrix-bound HA  
41 within a methacrylamide-functionalized gelatin (GelMA) hydrogel, the invasive phenotype of a  
42 patient-derived xenograft GBM population that exhibits significant in vivo invasivity, and the  
43 local production of soluble HA during GBM cell invasion. Hyaluronic acid of different  
44 molecular weights spanning a range associated with cell-mediated remodeling (10, 60, and 500  
45 kDa) was photopolymerized into GelMA hydrogels, with cell activity compared to GelMA only  
46 conditions (-HA). Polymerization conditions were tuned to create a homologous series of  
47 GelMA hydrogels with conserved poroelastic properties (i.e. shear modulus, Poisson's ratio, and  
48 diffusivity). GBM migration was strongly influenced by HA molecular weight. While markers  
49 associated with active remodeling of the HA content, hyaluronan synthase and hyaluronidase,  
50 were found to be insensitive to matrix immobilized HA content. These results provide new  
51 information regarding the importance of local hyaluronic acid content on the invasive phenotype  
52 of GBM.

## 54 **1. Introduction**

55 Glioblastoma (GBM), a WHO grade IV astrocytoma, is the most common and deadly form of  
56 brain cancer and accounts for more than 50% of primary brain tumors (Furnari et al.,  
57 2007; Nakada et al., 2007; Wen and Kesari, 2008). Unlike many other cancers that metastasize to  
58 a secondary site, GBM instead is known to diffusely infiltrate throughout but rarely metastasize  
59 beyond the brain, and this invasive phenotype contributes to poor patient prognosis (median  
60 survival < 15 months and 5 year survival < 5%) (Stupp et al., 2005; Jackson et al., 2011; Johnson  
61 and O'Neill, 2012; Mehta et al., 2015). The brain extracellular matrix and GBM tumor  
62 microenvironment (TME) display striking differences to other tumors, show a large amount of  
63 spatial and temporal heterogeneity, and can differ patient-to-patient. However, while fibrillar  
64 proteins such as collagen and fibronectin are abundant in many other tissues, the brain ECM has  
65 minimal fibrillar structures and is mainly composed of hyaluronic acid (HA, also called  
66 hyaluronan or hyaluronate) (Bonneh-Barkay and Wiley, 2009; Sivakumar et al., 2017).

67 The GBM TME is not homogeneous but a complicated heterogeneous environment, especially  
68 on the tumor margins, where transitions between the tumor microenvironment and surrounding  
69 brain parenchyma are characterized by transitions in structural, biomolecular, and cellular  
70 composition. The matrix compositional transition from natural brain to tumor provides a  
71 potential invasion path for GBM and, therefore, might contribute to poor patient prognosis  
72 (Syková, 2002; Quirico-Santos et al., 2010; Charles et al., 2011; Jackson et al., 2011; Wiranowska  
73 and Rojiani, 2011; Junttila and de Sauvage, 2013). Processes of GBM invasion, particularly in the

74 perivascular niche in the tumor margins, involve exposure to not only HA but a range of fibrillar  
75 protein content and significant matrix remodeling, resulting in GBM cell exposure to not only  
76 HA but also a wide range of molecular weights of HA (Bayin et al., 2014;Lathia et al., 2015;Paw  
77 et al., 2015). In this context, the amount and molecular weight distribution of HA, associated  
78 with constant turnover from oligosaccharides to high MW HA, across the tumor  
79 microenvironment is believed as an important regulator of GBM invasion (Itano and Kimata,  
80 2008). Hyaluronic acid, a negatively charged, nonsulfated GAG, is the main component of brain  
81 ECM. HA is naturally produced by hyaluronan synthase (HAS) family and degraded by  
82 hyaluronidase (HYAL) in mammalian animals (Misra et al., 2011). While the presence of HA  
83 has been shown to be important to tumor progression (Toole, 2004;Stern, 2008;Kim and Kumar,  
84 2014), significant investigation is needed to explore the role of the molecular weight (MW) of  
85 HA on processes associated with GBM invasion, progression, and therapeutic response.

86 Remodeling of hyaluronic acid in the context of GBM cell invasion requires the combined effort  
87 of a range of degradative and biosynthetic proteins. Notably, HA biosynthesis is driven by  
88 hyaluronic synthase (HAS), which has multiple isoforms responsible for secreting different MW  
89 HA (HAS1: 200-2000kDa; HAS2: >2000kDa; HAS3: 100-1000kDa). Similarly, the degradation  
90 of HA by hyaluronidase (HYAL) can produce final fragments with different MW. In GBM,  
91 HYAL1 (<20kDa) and HYAL2 (20-50kDa) are the most abundant HYAL isoforms (Misra et al.,  
92 2011;Khaldoynidi et al., 2014). Due to the constant synthesis and degradation of HA, a wide  
93 range of different molecular weight HA (High, >500kDa; Medium, 50-350 kDa; Low, <30 kDa)  
94 are present in the brain and TME (Toole, 2004;Lam et al., 2014;Monslow et al., 2015). HMW  
95 HA is important for structural support and the biophysical properties in tissue, and is directly  
96 synthesized via HAS. While HMW HA can inhibit tumor growth in colon cancer (Mueller et al.,  
97 2010) it also decreases production of MMPs by suppression of MAPK and Akt pathways (Chang  
98 et al., 2012). L-MMW, generated from HYAL degradation as final products, are often associated  
99 with enhanced invasion and increased tumor growth (Monslow et al., 2015). LMW and MMW  
100 HA have been reported to enhance cancer proliferation, cell adhesion as well as secretion of  
101 MMPs for matrix remodeling (Tofuku et al., 2006). LMW HA has also been reported to be pro-  
102 inflammatory and pro-angiogenic, which may contribute to cancer invasion (West et al.,  
103 1985;Lam et al., 2014). In contrast, the effects of oligo HA have been more variable. In papillary  
104 thyroid carcinoma, oligo HA is associated with increased (Dang et al., 2013), while other studies  
105 demonstrate suppression of signaling pathways such as Ras and Erk and reduced tumor  
106 progression (Misra et al., 2006;Toole et al., 2008).

107 Despite the conflicting HA-cancer relations and lack of full understanding of HA MW  
108 contribution, HA clearly plays a significant role in many signaling pathways and in tumor  
109 progression. In this study, we analyze the effects of matrix-bound HA on GBM cell invasion by  
110 using an in vitro fully three-dimensional gelatin based hydrogel system that our lab has  
111 previously developed (Pedron et al., 2013b;Chen et al., 2017c). Previous efforts have used this  
112 platform to demonstrate the effect of a single MW HA immobilized within the GelMA hydrogel  
113 on the invasive phenotype of GBM cell lines as well as the gene expression signature and  
114 response to a model tyrosine kinase inhibitor (erlotinib) (Chen et al., 2017a;Pedron et al.,  
115 2017a;Pedron et al., 2017b;Chen et al., 2018). Here we selectively decorate the GelMA hydrogel  
116 with a range of MW HA spanning those seen in the GBM TME (10, 60, 500 kDa). Further, we  
117 examine the behavior of a patient-derived xenograft (PDX) GBM specimen that maintains

118 patient specific molecular and morphologic characteristics (Sarkaria et al., 2006;Sarkaria et al.,  
119 2007). We evaluate cell growth, invasion, and proteomic responses of GBM cells within our  
120 platform and demonstrate the influence HA MW on GBM invasive phenotype.

## 121 **2. Materials and Methods**

### 122 **2.1. Hydrogel fabrication and characterization**

123 Fabrication of methacrylated gelatin (GelMA) and methacrylated hyaluronic acid (HAMA)  
124 precursors and hydrogels were as described in previous publications (Pedron et al., 2013b;Chen  
125 et al., 2017c). Briefly, gelatin powder (Type A, 300 bloom from porcine skin, Sigma-Aldrich)  
126 was dissolved in 60°C phosphate buffered saline (PBS; Lonza, Basel, Switzerland) then  
127 methacrylic anhydride (MA; Sigma-Aldrich) was added into the gelatin-PBS solution dropwise  
128 and allowed the reaction proceed for 1 hour. The GelMA solution was then dialyzed (12-14 kDa;  
129 Fisher Scientific) and lyophilized. HAMA was synthesized by adding 10 mL MA dropwise into  
130 a cold (4°C) HA sodium salt (10, 60 or 500 kDa; Lifecore Biomedical) solution (1g HA sodium  
131 salt in 100 mL DI water). The pH was adjusted to 8 with the addition of 5N sodium hydroxide  
132 solution (NaOH; Sigma-Aldrich) and the reaction proceeded overnight at 4°C. The product was  
133 then purified by dialysis and lyophilized. The degree of MA functionalization of both GelMA  
134 and HAMA was determined by <sup>1</sup>H NMR (data not shown) (Pedron et al., 2013b;Chen et al.,  
135 2017c).

136 Hydrogels (GelMA ± HAMA) were prepared by dissolving GelMA and HAMA in PBS at a total  
137 concentration of 4 wt% with gentle heating (37°C ~45°C) in the presence of a lithium  
138 acylphosphinate (LAP) as photoinitiator (PI, adjusted to maintain same Young's modulus). The  
139 mixture was placed into Teflon molds (0.15 mm thick, 5 mm radius) and photopolymerized  
140 under UV light (AccuCure LED 365 nm, Intensity 7.1 mW/cm<sup>2</sup>) for 30s (Mahadik et al., 2015).  
141 Cell-containing hydrogels were made similarly but with addition of cells (4x10<sup>6</sup> cells/ mL  
142 hydrogel solution) to the pre-polymer solution, prior to pipetting into Teflon molds, and then  
143 photopolymerized. Details regarding the hydrogel compositions are listed in **Table 1**. All HA  
144 containing GelMA hydrogel groups were fabricated with 15% w/w HA, consistent with previous  
145 HA-decorated GelMA hydrogels described by our group (Pedron et al., 2015;Chen et al.,  
146 2017a;Pedron et al., 2017a;Pedron et al., 2017b;Chen et al., 2018).

### 147 **2.2. Characterization of hydrogels**

#### 148 **2.2.1. Young's modulus**

149 The compressive modulus of each hydrogel variant was measured using an Instron 5943  
150 mechanical tester. Hydrogels were tested under unconfined compression with a pre-load 0.005N  
151 at the rate of 0.1 mm/min, with their Young's modulus obtained from the linear region of the  
152 stress-strain curve (0-10 % strain).

#### 153 **2.2.1. Diffusivity**

154 The water diffusivity of each hydrogel was measured through indentation tests using atomic  
155 force microscopy (AFM, MFP-3D AFM, Asylum Research) (**Figure 1**). The stiffness of the  
156 cantilever used in the measurements is 0.6 N/m. A spherical polystyrene probe of 25  $\mu\text{m}$   
157 diameter was attached to the tip (Novascan). Three separate measurements of different  
158 indentation depths were taken. After surface detection, the spherical indenter was pressed into  
159 the sample to a certain depth in the rate of 50  $\mu\text{m/s}$  and was held for a period of time until the  
160 force on the indenter reaches a constant value. The force on the indenter was measured as a  
161 function of time  $F(t)$ . The time-dependent response of hydrogels is due to solvent migration. The  
162 poroelastic relaxation indentation problem has been solved theoretically by Hu *et al.* (Hu et al.,  
163 2010;Hu et al., 2011). Simple solutions have been derived for direct extraction of material  
164 properties from the relaxation indentation measurement. According to this method, the  
165 normalized force relaxation function is a function of a single variable: the normalized time  
166  $\tau=Dt/a^2$ , with  $D$  being the diffusivity,  $t$  being time, and  $a$  being the contact radius that is related  
167 to the radius of the spherical probe  $R$  and indentation depth  $h$  by  $a=\sqrt{Rh}$ :

$$168 \quad \frac{F(t)-F(\infty)}{F(0)-F(\infty)} = g\left(\frac{Dt}{a^2}\right) \quad (1)$$

169 This master curve has been derived numerically as

$$170 \quad g(\tau) = 0.491e^{-0.908\sqrt{\tau}} + e^{-1.679\tau} \quad (2)$$

171 Normalizing the experimental data and fitting it with the theoretical curve (Eq.2), we can extract  
172 the single fitting parameter diffusivity  $D$ . More details can be seen in references (Hu et al.,  
173 2010;Hu et al., 2011).

174

### 175 **2.3. Patient derived xenograft cell culture**

176 Short-term explant cultures derived from the GBM39 PDX model were obtained from Mayo  
177 Clinic (Rochester, Minnesota). PDX samples were mechanically disaggregated, plated on low-  
178 growth factor Matrigel coated tissue culture flasks in in standard culture media made with  
179 Dulbecco's modified eagle medium (DMEM; Gibco) supplemented with 10% fetal bovine serum  
180 (FBS; Atlanta biologicals) and 1% penicillin/streptomycin (P/S; Lonza) at 37 °C in a 5% CO<sub>2</sub>  
181 environment. Flasks were shipped by overnight expression and then used upon arrival after  
182 trypsinization. For analysis of cell metabolic health and protein expression, GBM39 cells were  
183 homogeneously mixed with the GelMA  $\pm$  HAMA solution at a density of  $4 \times 10^6$  cells/mL. Cell-  
184 seeded hydrogels were incubated in cell culture medium at 37°C, 5% CO<sub>2</sub> in low adhesion well  
185 plates containing standard culture media (DMEM with 10% FBS and 1% P/S). Culture media  
186 was changed at day 3 and day 5 for all cell-containing hydrogels.

### 187 **2.4. Time-lapse cell invasion assay using spheroids**

188 To measure relative cell motion in the fully three-dimensional hydrogel environment, we  
189 embedded GBM spheroids into our hydrogel. A methylcellulose (MC, 12 wt% in 0.5x PBS,

190 Sigma-Aldrich) solution was made with constant stirring at 4°C overnight, then autoclaved and  
191 kept at 4°C for storage. MC solution was then added into 96-well plate and kept at 37°C  
192 overnight to form a non-adherent MC-hydrogel layer. 10<sup>5</sup> GBM cells were added to each well,  
193 placed at 37°C - 5% CO<sub>2</sub> environment with constant horizontal-shaking (60 rpm) overnight to  
194 aid spheroid formation (Lee et al., 2011). Spheroids were then mixed with pre-polymer GelMA ±  
195 HAMA solution, photopolymerized and cultured following the same method previously  
196 described. Cell invasion into the hydrogel was traced throughout seven-day culture by taking  
197 images on days 0 (immediately after embedding), 1, 2, 3, 5 and 7 using a Leica DMI 400B  
198 fluorescence microscope under bright field. Analysis of cell invasion distance ( $d_i = r_i - r_0$ ) was  
199 quantified via ImageJ using the relative radius (cell spreading shape  $\sim \pi r_i^2$ ) compared to day 0 ( $r_0$ )  
200 using a method previously described by our group (Chen et al., 2017a).

## 201 **2.5. Analysis of cell metabolic activity**

202 The total metabolic activity of cell-containing hydrogels was measured immediately after  
203 hydrogel encapsulation (day 0) and then subsequently at days 3 and 7 of hydrogel culture.  
204 Metabolic activity was analyzed using a dimethylthiazol-diphenyltetrazolium bromide assay  
205 (MTT; Molecular Probes) following manufacturer's instructions. Briefly, at each time point the  
206 culture media surrounding each hydrogel sample was replaced with MTT-containing media and  
207 incubated for 4 hours, then solution was replaced with dimethyl sulfoxide (DMSO; Sigma-  
208 Aldrich) and set overnight. Metabolic activity of samples was measured via absorbance at 540  
209 nm using a microplate reader (Synergy HT, Biotek), with data normalized to day 0 samples  
210 (immediately after seeding) as fold change.

## 211 **2.6. Quantification of soluble hyaluronic acid secretion**

212 The concentration of soluble HA in the media was quantified from sample media using an  
213 enzyme-linked immunosorbent assay (ELISA, R&D systems) following the manufacturer's  
214 instructions. Sample media were collected at days 3, 5 and 7. Samples were analyzed via a  
215 microplate reader (Synergy HT, Biotek) with 450/540 nm wavelength absorbance. Soluble HA  
216 concentration within the media at each time point was calculated, with accumulated results  
217 reported as a function of all previous time point measurements.

## 218 **2.7. Protein isolation and Western blotting**

219 Procedures of protein isolation and Western blotting were described in previous publication  
220 (Caliari et al., 2015). Protein isolation was done by extracting proteins from cell-containing  
221 hydrogels by using cold RIPA buffer and incubating for 30 minutes. Total protein concentration  
222 in the lysates was determined by Pierce™ BCA Protein Assay Kit (Thermo Scientific). Lysates  
223 were then mixed with 2x Laemmli Sample Buffer (Bio-Rad) and 2-Mercaptoethanol (Sigma-  
224 Aldrich), heated to 95°C for 10 minutes, then loaded (3 µg protein loaded onto per lane) onto  
225 polyacrylamide gels (4%-20% gradient; Bio-Rad). Gel electrophoresis was performed at 150 V.  
226 Proteins were then transferred onto nitrocellulose membrane (GE Healthcare) using Trans-Blot  
227 SD (Bio-Rad) under 300 mA for 2 h. Membranes were then cut into desired MW range and  
228 blocked in blocking buffer for 1 h followed by primary antibodies incubation at 4 °C overnight.  
229 Membranes were subsequently washed with Tris Buffered Saline with Tween20 (TBST),

230 followed by secondary antibody incubation for 2 hours at room temperature. Imaging signal was  
231 visualized using imaging kits (SuperSignal™ West Pico PLUS Chemiluminescent Substrate or  
232 SuperSignal™ West Femto Maximum Sensitivity Substrate, Sigma-Aldrich) via an Image Quant  
233 LAS 4010 chemiluminescence imager (GE Healthcare). Band intensities were quantified using  
234 ImageJ and normalized to  $\beta$ -actin expression. Buffers and antibodies used in each condition are  
235 listed (**Table S1**).

## 236 **2.8. Statistics**

237 All statistical analysis was performed using one-way analysis of variance (ANOVA) followed by  
238 Tukey's test. A minimum sample number of  $n = 3$  (MTT, ELISA, Western),  $n = 6$  (Young's  
239 modulus, diffusivity, invasion) samples were used for all assays. Statistical significance was set  
240 at  $p < 0.05$ . Error is reported as the standard error of the mean.

## 241 **3. Results**

242 GelMA hydrogels lacking matrix-bound HA will be denoted as "-HA" while hydrogels  
243 containing 15 w/w% HAMA will be denoted as "10K", "60K", or "500K" to denote the  
244 molecular weight of the incorporated HA sodium.

### 245 **3.1. Molecular weight of matrix-bound HA does not impact Young's moduli or diffusive** 246 **properties of the family of gelatin hydrogels**

247 The biophysical properties of the homologous series of GelMA hydrogel (-HA, 10K, 60K, 500K)  
248 were assessed via unconfined compression and AFM indentation. The Young's moduli of all  
249 hydrogels did not vary as a result of inclusion of matrix-bound HA regardless of the HA MW.  
250 Critically, the Young's modulus of these hydrogels (-HA:  $2.76 \pm 0.24$  kPa; 10K:  $2.97 \pm 0.15$  kPa;  
251 60K:  $2.79 \pm 0.15$  kPa; 500K:  $2.70 \pm 0.03$  kPa) are within physio-relevant range ( $10^0$ - $10^1$  kPa) for  
252 the GBM TME. Similarly, the diffusivity of all hydrogel variants was not significantly  
253 influenced by the presence or absence of matrix immobilized HA (-HA:  $161.04 \pm 70.33$   $\mu\text{m}^2/\text{s}$ ;  
254 10K:  $153.54 \pm 34.92$   $\mu\text{m}^2/\text{s}$ ; 60K:  $169.90 \pm 26.88$ ; 500K:  $156.43 \pm 50.18$   $\mu\text{m}^2/\text{s}$ ) (**Figure 1**).

### 255 **3.2. Metabolic activity of GBM39 PDX cells cultured in GelMA hydrogels is sensitive to the** 256 **molecular weight of matrix bound HA**

257 The metabolic activity of GBM39 PDX cells encapsulated within the homologous series of  
258 GelMA hydrogels (-HA, 10K, 60K, 500K) was traced through 7 days in culture, with results  
259 normalized to day 0 values for each group. The groups with matrix-bound HA (10K, 60K and  
260 500K) showed a significantly higher metabolic activity compare to -HA group ( $p < 0.05$ ), with  
261 the 60K HA group showing the highest metabolic activity amongst all groups (**Figure 2**).

### 262 **3.3. The molecular weight of matrix-bound HA significantly affects invasion**

263 The invasion of GBM39 PDX cells into the surrounding hydrogel matrix was measured via a  
264 previously reported spheroid assay through 7-days in culture. GBM39 invasion was strongly  
265 influenced by hydrogel HA content. The highest level of invasion was observed for GelMA

266 hydrogels either lacking matrix bound HA (-HA), or those containing mid-range (60K)  
267 molecular weight matrix-immobilized HA (**Figure 3**). At early-to-mid time points (up to day 5),  
268 GBM cell invasion was significantly depressed in the low molecular weight 10K group, but  
269 GBM invasion increased steeply at later time points (day 7), matching the highest invasion  
270 groups. GelMA hydrogels containing the largest molecular weight HA (500K) showed  
271 significantly reduced invasion compared to all other hydrogel groups (-HA, 10K, 60K)  
272 throughout the entire period studied.

### 273 **3.4. The accumulation of soluble HA in media reflects matrix-composition**

274 ELISA was performed to measure the concentration of soluble HA in the culture media over the  
275 course of the invasion experiment. An increase in soluble HA concentration was observed in the  
276 hydrogels lacking matrix bound HA (-HA) compared to all groups containing matrix-bound HA.  
277 Interestingly, the presence of soluble HA for hydrogel groups containing matrix-immobilized  
278 HA was found to be strongly associated with the molecular weight of immobilized HA, with  
279 500K group showing significantly upregulated secretion compared to GBM cells in 10K and  
280 60K HA hydrogels as early as day 3. Significant increases were observed in soluble HA  
281 production in 60K vs. 10K hydrogels appeared by day 7 of culture (**Figure 4**).

### 282 **3.5. Protein expression of hyaluronic acid remodeling associated proteins were not strongly** 283 **influenced by hydrogel HA content.**

284 The expression of protein families, biosynthetic hyaluronan synthase (HAS1, HAS2, HAS3) and  
285 degradative hyaluronidase (HYAL1, HYAL2), associated with HA remodeling were  
286 subsequently quantified via Western blot analyses (**Figure 5, Figure S1-S2**). No significant  
287 differences were observed in expression levels within each group as a function of immobilized  
288 HA molecular weight. However, GBM cells in the highest molecular weight HA hydrogels  
289 (500K) showed generalized increases in both HAS and HYAL (significant for HYAL2)  
290 compared to all other hydrogel conditions.

## 291 **4. Discussion**

292 The heterogeneity of GBM tumor microenvironment complicates its study both in vivo and in  
293 vitro. Within that high diversity, the extracellular HA has been widely associated with cancer  
294 invasion and response to treatment (Park et al., 2008; Rankin and Frankel, 2016; Zhao et al.,  
295 2017). Naturally, HA is synthesized and deposited in the extracellular space by HAS family and  
296 degraded into different size fragments by HYAL enzyme family. The alteration of the levels of  
297 these enzymes are associated with various types of diseases. LMW HA (< 30 kDa) has been  
298 associated mainly with increased tumor growth, cell migration and angiogenesis, while HMW  
299 (250 to >1000 kDa) is commonly believed to lead to greater structural stability with reduced  
300 tumor growth, migration, and angiogenesis (Monslow et al., 2015). However, despite their  
301 relevance in GBM microenvironment, the influence of HA MW has been largely neglected in  
302 regard to the construction of ex vivo biomaterial platforms to examine GBM cell activity. This  
303 project seeks to understand the effect of HA molecular weight, both matrix bound and cell  
304 secreted, on the invasive phenotype of a patient-derive GBM specimen. We developed and



305 characterized a homologous series of HA-decorated gelatin-based hydrogels to evaluate the  
306 effect of HA MW on GBM invasiveness and phenotypic responses.

307 A family of hydrogels with no matrix-bound HA or with increasing MW HA (10kDa, 60kDa and  
308 500kDa) was fabricated using a method previously described (Pedron et al., 2013b;Chen et al.,  
309 2017c). Studies demonstrate that substrate stiffness and diffusion can deeply influence the  
310 migration capacity of GBM cells in HA containing hydrogels (Rape et al., 2014;Umesh et al.,  
311 2014;Wang et al., 2014;Chen et al., 2017b). However, we have previously described a  
312 framework to adjust the relative ratio of GelMA to HA content as well as manipulating the  
313 crosslinking conditions to generate a series of GelMA hydrogels containing increasing wt% of a  
314 single MW HA (Pedron et al., 2013a). We therefore adapted this approach to create the  
315 homologous series of hydrogels described in this study, that contained a conserved wt% of HA  
316 but that varied the MW of matrix-immobilized HA. We then employed a series of biophysical  
317 and biochemical characterization protocols to describe poroelastic features of these hydrogels.  
318 Crosslinking density can be preserved by adjusting the photoinitiator concentration in the pre-  
319 polymer solution (**Table 1**), and therefore maintaining the Young's modulus between different  
320 hydrogels. Moreover, the deformation of the gel in contact with the AFM tip results from two  
321 simultaneous molecular processes: the conformational change of the network, and the migration  
322 of the solvent molecules (Hu et al., 2010). In this case, the poroelasticity of the hydrogels,  
323 characterized by the diffusivity (**Figure 1D**), stays unchanged for all samples used. Both  
324 Young's modulus and diffusivity showed no significant difference among all groups suggesting  
325 these hydrogels were able to provide similar culture conditions for cells while providing the  
326 opportunity to adjust the molecular weight of bound HA.

327 We subsequently measured the metabolic activity of GBM39 PDX cells as a function of matrix  
328 bound HA MW. The presence of matrix-bound HA aided GBM metabolic response compared to  
329 the -HA group. In general, all cells remained viable within the hydrogel up to 7 days, without  
330 showing apoptosis or cell death. Further, we performed a spheroid-based invasion assay to  
331 investigate the effects of matrix-bound HA MW on invasion at different time points, including  
332 early (1 and 2 days), mid (3 and 5 days) and longer (7 day) time points. Consistent with earlier  
333 observations described by our group using GBM cell lines (Chen et al., 2017a;Chen et al., 2018),  
334 we found GBM invasion in GelMA hydrogels lacking matrix bound HA was greatest. However,  
335 invasion was strongly influence by the MW of immobilized HA with GBM cell invasion in  
336 hydrogels containing 60kDa being equivalent to hydrogels lacking matrix bound HA. Further,  
337 this invasive potential of GBM39 cells within -HA and +HA hydrogels is not associated to their  
338 metabolic activity profiles (**Figure 2**). Although migration and proliferation are considered to be  
339 circumscribed phenotypes that do not co-occur with each other in GBM, the complex  
340 microenvironment of PDX suggests that both can coexist. Moreover, GBM cells adapt to the  
341 different phenotypes by using regulatory signaling from the local microenvironment (Xie et al.,  
342 2014). Interestingly, while invasion was initially significantly reduced in low MW HA hydrogels  
343 (10K), GBM invasion increased significantly at later time points. However, GBM invasions was  
344 strongly reduced in GelMA hydrogels containing high molecular weight HA (500K) throughout  
345 the entirety of the study, suggesting more mature HA matrices will inhibit GBM invasion. While  
346 recent studies have begun to examine the design of implants to reduce GBM invasion (Jain et al.,  
347 2014), these findings suggest an interesting line of future studies that wound center on the  
348 incorporation of hydrogels into the resection margins containing attractive biomechanical and

349 biomolecular properties to potentially recruit nearby GBM cells as a means to reduce invasive  
350 spreading. Regardless, the presence of both fibrillar and HA associated features of the TME in  
351 these HA decorated GelMA hydrogels may be particularly useful in the context of GBM  
352 invasion in perivascular niches that contain such matrix diversity (Ngo and Harley, 2018).

353 Studies have shown that HMW HA could inhibit tumor invasion by inhibiting MMPs production  
354 and down-regulating invasion related pathways such as MAPK and Akt (Chang et al., 2012),  
355 while LMW HA may promote these invasion related pathways (West et al., 1985; Lam et al.,  
356 2014). We hypothesized that the significant decrease of motility in PDX cells in 500kDa  
357 hydrogels is due to the down-regulation of invasion related pathways, induced by the local  
358 extracellular microenvironment. We observed endogenous HA production was significantly  
359 elevated without the presence of matrix-bound HA (-HA) (**Figure 4**), consistent with previous  
360 studies reported by our group using immortalized cell lines that demonstrated soluble HA  
361 production was associated with increased GBM cell invasion (Chen et al., 2017c). More  
362 interestingly, soluble HA production across the homologous series of hydrogels tested in this  
363 study (-HA, 10K, 60K, 500K) showed greatest endogenous HA production in hydrogels lacking  
364 matrix immobilized HA. However, endogenous production of HA was also sensitive to the  
365 molecular weight of matrix bound HA, with greater endogenous HA production seen with  
366 increasing molecular weight of bound HA. This trend of increasing soluble HA production with  
367 increasing molecular weight of matrix-bound HA may be associated to an adaptation required to  
368 mobilize matrix bound HA for invasion.

369 Many studies have shown that the levels of HAS correlate with breast and colon cancer  
370 malignancy and patient prognosis (Bullard et al., 2003; Auvinen et al., 2014). Inhibition of HAS  
371 has been used as an alternative therapeutic strategy using mRNA silencing HAS or HAS-  
372 targeting drugs (e.g. 4-Methylubelliferone) (Nakamura et al., 1997; Li et al., 2007; Nagy et al.,  
373 2015). While some studies suggest addition of HYAL into chemotherapy efficiently improves  
374 the patient prognosis (Baumgartner et al., 1998; Klocker et al., 1998; Stern, 2008), others show  
375 HYAL levels are correlated with cancer malignancy and invasiveness in breast, prostate and  
376 bladder cancers (Lokeshwar et al., 1996; Madan et al., 1999; Lokeshwar et al., 2005; Stern, 2008).  
377 While we observe no significant across-the-board trends in HAS and HYAL proteins levels as a  
378 function of matrix immobilized HA, GBM cells in hydrogels containing the highest molecular  
379 weight HA (500 kDa) show overall a higher expression of all HAS and HYAL families  
380 compared to the rest. However, these results did not directly correlate with the GBM  
381 invasiveness as for what we observed. While HAS and HYAL both play a key role in tumor  
382 progression and invasiveness, the dynamic balance might be more crucial instead of one over the  
383 other, suggesting opportunities for future studies using an expanded library of patient-derived  
384 GBM specimens using this homologous series of GelMA hydrogels.

385 High production of HA is normally associated with tumor progression, although overly high  
386 levels of hyaluronic acid secretion may lead to an opposite behavior (Itano et al., 2004).  
387 Moreover, in gliomas, this HA associated tumor progression only occurs if hyaluronan is  
388 expressed simultaneously with HAS (Eneget et al., 2002). Therefore, studies suggest that HA  
389 turnover is required for the increase of HA associated GBM tumor malignancy. Additionally, the  
390 relative contribution of matrix-bonded and cell produced HA increases this complexity.  
391 Therefore, a feedback mechanism between stromal and produced HA has been drafted for

392 epithelial cancers (Koyama et al., 2007) but is still unexplored in glioblastoma. In this study  
393 using an ex vivo biomaterial model, we show how the dynamic interplay between extracellular  
394 matrix associated and cell produced HA affects GBM cell behavior. Further ongoing research  
395 may allow identification of alternative antitumor treatments in the context of the GBM  
396 microenvironment.

## 397 **5. Acknowledgements**

398 Hydrogel diffusivity measurements were carried out in part in the Frederick Seitz Materials  
399 Research Laboratory Central Research Facilities, University of Illinois at Urbana-Champaign.  
400 HA MW distribution imaging was carried out in the Protein Sciences center of the Roy J. Carver  
401 Biotechnology Center, University of Illinois at Urbana-Champaign. Research reported in this  
402 publication was supported by the National Cancer Institute, National Institute of Diabetes and  
403 Digestive and Kidney Diseases, and the National Institute of Biomedical Imaging and  
404 Bioengineering of the National Institutes of Health under Award Numbers R01CA197488  
405 (BACH), R01 DK099528 (BACH), and T32EB019944 (JEC). The content is solely the  
406 responsibility of the authors and does not necessarily represent the official views of the National  
407 Institutes of Health. The authors are also grateful for additional funding provided by the  
408 Department of Chemical & Biomolecular Engineering (BACH) and the Carl R. Woese Institute  
409 for Genomic Biology (BACH) at the University of Illinois at Urbana-Champaign. Development  
410 and maintenance of the GBM PDX models was supported by Mayo Clinic, the Mayo SPORE in  
411 Brain Cancer (CA108961), and the Mayo Clinic Brain Tumor Patient-Derived Xenograft  
412 National Resource (NS092940).

413

## 414 **6. Conflict of Interest**

415 The authors declare that the research was conducted in the absence of any commercial or  
416 financial relationships that could be construed as a potential conflict of interest.

## 417 **7. Author Contributions**

418 JEC, SP and BACH designed experiments, performed cell experiments, data analysis, results  
419 interpretation, and wrote the manuscript. PS, YH performed AFM experiments and assisted with  
420 manuscript writing. JS assisted with experiment design, results interpretation, and manuscript  
421 writing. BACH is the principal investigator.

## 422 **8. References**

- 423 Auvinen, P., Rilla, K., Tumelius, R., Tammi, M., Sironen, R., Soini, Y., Kosma, V.M.,  
424 Mannermaa, A., Viikari, J., and Tammi, R. (2014). Hyaluronan synthases (HAS1-3) in  
425 stromal and malignant cells correlate with breast cancer grade and predict patient  
426 survival. *Breast Cancer Res Treat* 143, 277-286.
- 427 Baumgartner, G., Gomar-Hoss, C., Sakr, L., Ulsperger, E., and Wogritsch, C. (1998). The impact  
428 of extracellular matrix on the chemoresistance of solid tumors--experimental and clinical  
429 results of hyaluronidase as additive to cytostatic chemotherapy. *Cancer Lett* 131, 85-99.

- 430 Bayin, N.S., Modrek, A.S., and Placantonakis, D.G. (2014). Glioblastoma stem cells: molecular  
431 characteristics and therapeutic implications. *World J Stem Cells* 6, 230-238.
- 432 Bonneh-Barkay, D., and Wiley, C.A. (2009). Brain Extracellular Matrix in Neurodegeneration.  
433 *Brain Pathology* 19, 573-585.
- 434 Bullard, K.M., Kim, H.R., Wheeler, M.A., Wilson, C.M., Neudauer, C.L., Simpson, M.A., and  
435 Mccarthy, J.B. (2003). Hyaluronan synthase-3 is upregulated in metastatic colon  
436 carcinoma cells and manipulation of expression alters matrix retention and cellular  
437 growth. *Int J Cancer* 107, 739-746.
- 438 Caliari, S.R., Weisgerber, D.W., Grier, W.K., Mahmassani, Z., Boppart, M.D., and Harley,  
439 B.a.C. (2015). Collagen Scaffolds Incorporating Coincident Gradations of Instructive  
440 Structural and Biochemical Cues for Osteotendinous Junction Engineering. *Advanced*  
441 *Healthcare Materials* 4, 831-837.
- 442 Chang, C.-C., Hsieh, M.-S., Liao, S.-T., Chen, Y.-H., Cheng, C.-W., Huang, P.-T., Lin, Y.-F.,  
443 and Chen, C.-H. (2012). Hyaluronan regulates PPAR $\gamma$  and inflammatory responses in IL-  
444 1 $\beta$ -stimulated human chondrosarcoma cells, a model for osteoarthritis. *Carbohydrate*  
445 *Polymers* 90, 1168-1175.
- 446 Charles, N.A., Holland, E.C., Gilbertson, R., Glass, R., and Kettenmann, H. (2011). The brain  
447 tumor microenvironment. *Glia* 59, 1169-1180.
- 448 Chen, J.-W., Blazek, A., Lumibao, J., Gaskins, H.R., and Harley, B.a.C. (2018). Hypoxia  
449 activates enhanced invasive potential and endogenous hyaluronic acid production by  
450 glioblastoma cells. *Biomater Sci* 6, 854-862.
- 451 Chen, J.-W., Pedron, S., and Harley, B.a.C. (2017a). The combined influence of hydrogel  
452 stiffness and matrix-bound hyaluronic acid content on glioblastoma invasion. *Macromol*  
453 *Biosci* 17, 1700018.
- 454 Chen, J.-W.E., Pedron, S., and Harley, B.A. (2017b). The combined influence of hydrogel  
455 stiffness and matrix-bound hyaluronic acid content on glioblastoma invasion.  
456 *Macromolecular Bioscience*.
- 457 Chen, J.-W.E., Pedron, S., and Harley, B.a.C. (2017c). The combined influence of hydrogel  
458 stiffness and matrix-bound hyaluronic acid content on glioblastoma invasion.  
459 *Macromolecular Bioscience* 17, 1700018.
- 460 Dang, S., Peng, Y., Ye, L., Wang, Y., Qian, Z., Chen, Y., Wang, X., Lin, Y., Zhang, X., Sun, X.,  
461 Wu, Q., Cheng, Y., Nie, H., Jin, M., and Xu, H. (2013). Stimulation of TLR4 by LMW-  
462 HA Induces Metastasis in Human Papillary Thyroid Carcinoma through CXCR7.  
463 *Clinical and Developmental Immunology* 2013, 712561.
- 464 Enegd, B., King, J.a.J., Stylli, S., Paradiso, L., Kaye, A.H., and Novak, U. (2002).  
465 Overexpression of Hyaluronan Synthase-2 Reduces the Tumorigenic Potential of Glioma  
466 Cells Lacking Hyaluronidase Activity. *Neurosurgery* 50, 1311-1318.
- 467 Furnari, F.B., Fenton, T., Bachoo, R.M., Mukasa, A., Stommel, J.M., Stegh, A., Hahn, W.C.,  
468 Ligon, K.L., Louis, D.N., Brennan, C., Chin, L., Depinho, R.A., and Cavenee, W.K.  
469 (2007). Malignant astrocytic glioma: genetics, biology, and paths to treatment. *Genes*  
470 *Dev* 21, 2683-2710.
- 471 Hu, Y., Chen, X., Whitesides, G.M., Vlassak, J.J., and Suo, Z. (2011). Indentation of  
472 polydimethylsiloxane submerged in organic solvents. *Journal of Materials Research* 26,  
473 785-795.
- 474 Hu, Y., Zhao, X., Vlassak, J.J., and Suo, Z. (2010). Using indentation to characterize the  
475 poroelasticity of gels. *Applied Physics Letters* 96, 121904.

- 476 Itano, N., and Kimata, K. (2008). Altered hyaluronan biosynthesis in cancer progression.  
477 *Seminars in Cancer Biology* 18, 268-274.
- 478 Itano, N., Sawai, T., Atsumi, F., Miyaishi, O., Taniguchi, S.I., Kannagi, R., Hamaguchi, M., and  
479 Kimata, K. (2004). Selective Expression and Functional Characteristics of Three  
480 Mammalian Hyaluronan Synthases in Oncogenic Malignant Transformation. *Journal of*  
481 *Biological Chemistry* 279, 18679-18687.
- 482 Jackson, C., Ruzevick, J., Phallen, J., Belcaid, Z., and Lim, M. (2011). Challenges in  
483 Immunotherapy Presented by the Glioblastoma Multiforme Microenvironment. *Clinical*  
484 *and Developmental Immunology* 2011, 732413.
- 485 Jain, A., Betancur, M., Patel, G.D., Valmikinathan, C.M., Mukhatyar, V.J., Vakharia, A., Pai,  
486 S.B., Brahma, B., Macdonald, T.J., and Bellamkonda, R.V. (2014). Guiding intracortical  
487 brain tumour cells to an extracortical cytotoxic hydrogel using aligned polymeric  
488 nanofibres. *Nat Mater* 13, 308-316.
- 489 Johnson, D.R., and O'Neill, B.P. (2012). Glioblastoma survival in the United States before and  
490 during the temozolomide era. *Journal of Neuro-Oncology* 107, 359-364.
- 491 Junttila, M.R., and De Sauvage, F.J. (2013). Influence of tumour micro-environment  
492 heterogeneity on therapeutic response. *Nature* 501, 346.
- 493 Khaldoyanidi, S.K., Goncharova, V., Mueller, B., and Schraufstatter, I.U. (2014). Hyaluronan in  
494 the healthy and malignant hematopoietic microenvironment. *Adv Cancer Res* 123, 149-  
495 189.
- 496 Kim, Y., and Kumar, S. (2014). "The Role of Hyaluronic Acid and Its Receptors in the Growth  
497 and Invasion of Brain Tumors," in *Tumors of the Central Nervous System, Volume 13:*  
498 *Types of Tumors, Diagnosis, Ultrasonography, Surgery, Brain Metastasis, and General*  
499 *CNS Diseases*, ed. M.A. Hayat. (Dordrecht: Springer Netherlands), 253-266.
- 500 Klocker, J., Sabitzer, H., Raunik, W., Wieser, S., and Schumer, J. (1998). Hyaluronidase as  
501 additive to induction chemotherapy in advanced squamous cell carcinoma of the head and  
502 neck. *Cancer Lett* 131, 113-115.
- 503 Koyama, H., Hibi, T., Isogai, Z., Yoneda, M., Fujimori, M., Amano, J., Kawakubo, M., Kannagi,  
504 R., Kimata, K., Taniguchi, S.I., and Itano, N. (2007). Hyperproduction of Hyaluronan in  
505 Neu-Induced Mammary Tumor Accelerates Angiogenesis through Stromal Cell  
506 Recruitment: Possible Involvement of Versican/Pg-M. *The American Journal of*  
507 *Pathology* 170, 1086-1099.
- 508 Lam, J., Truong, N.F., and Segura, T. (2014). Design of Cell-Matrix Interactions in Hyaluronic  
509 Acid Hydrogel Scaffolds. *Acta biomaterialia* 10, 1571-1580.
- 510 Lathia, J.D., Mack, S.C., Mulkearns-Hubert, E.E., Valentim, C.L., and Rich, J.N. (2015). Cancer  
511 stem cells in glioblastoma. *Genes Dev* 29, 1203-1217.
- 512 Lee, W.-Y., Tsai, H.-W., Chiang, J.-H., Hwang, S.-M., Chen, D.-Y., Hsu, L.-W., Hung, Y.-W.,  
513 Chang, Y., and Sung, H.-W. (2011). Core-shell cell bodies composed of human cbMSCs  
514 and HUVECs for functional vasculogenesis. *Biomaterials* 32, 8446-8455.
- 515 Li, Y., Li, L., Brown, T.J., and Heldin, P. (2007). Silencing of hyaluronan synthase 2 suppresses  
516 the malignant phenotype of invasive breast cancer cells. *Int J Cancer* 120, 2557-2567.
- 517 Lokeshwar, V.B., Cerwinka, W.H., and Lokeshwar, B.L. (2005). HYAL1 hyaluronidase: a  
518 molecular determinant of bladder tumor growth and invasion. *Cancer Res* 65, 2243-2250.
- 519 Lokeshwar, V.B., Lokeshwar, B.L., Pham, H.T., and Block, N.L. (1996). Association of elevated  
520 levels of hyaluronidase, a matrix-degrading enzyme, with prostate cancer progression.  
521 *Cancer Res* 56, 651-657.

- 522 Madan, A.K., Yu, K., Dhurandhar, N., Cullinane, C., Pang, Y., and Beech, D.J. (1999).  
523 Association of hyaluronidase and breast adenocarcinoma invasiveness. *Oncol Rep* 6, 607-  
524 609.
- 525 Mahadik, B.P., Pedron Haba, S., Skertich, L.J., and Harley, B.A. (2015). The use of covalently  
526 immobilized stem cell factor to selectively affect hematopoietic stem cell activity within  
527 a gelatin hydrogel. *Biomaterials* 67, 297-307.
- 528 Mehta, A.I., Linninger, A., Lesniak, M.S., and Engelhard, H.H. (2015). Current status of  
529 intratumoral therapy for glioblastoma. *Journal of Neuro-Oncology* 125, 1-7.
- 530 Misra, S., Heldin, P., Hascall, V.C., Karamanos, N.K., Skandalis, S.S., Markwald, R.R., and  
531 Ghatak, S. (2011). Hyaluronan-CD44 interactions as potential targets for cancer therapy.  
532 *FEBS J* 278, 1429-1443.
- 533 Misra, S., Toole, B.P., and Ghatak, S. (2006). Hyaluronan constitutively regulates activation of  
534 multiple receptor tyrosine kinases in epithelial and carcinoma cells. *J Biol Chem* 281,  
535 34936-34941.
- 536 Monslow, J., Govindaraju, P., and Puré, E. (2015). Hyaluronan – A Functional and Structural  
537 Sweet Spot in the Tissue Microenvironment. *Frontiers in Immunology* 6, 231.
- 538 Mueller, B.M., Schraufstatter, I.U., Goncharova, V., Povaliy, T., Discipio, R., and Khaldoyanidi,  
539 S.K. (2010). Hyaluronan Inhibits Postchemotherapy Tumor Regrowth in a Colon  
540 Carcinoma Xenograft Model. *Molecular Cancer Therapeutics* 9, 3024-3032.
- 541 Nagy, N., Kuipers, H.F., Frymoyer, A.R., Ishak, H.D., Bollyky, J.B., Wight, T.N., and Bollyky,  
542 P.L. (2015). 4-Methylumbelliferone Treatment and Hyaluronan Inhibition as a  
543 Therapeutic Strategy in Inflammation, Autoimmunity, and Cancer. *Frontiers in*  
544 *Immunology* 6, 123.
- 545 Nakada, M., Nakada, S., Demuth, T., Tran, N.L., Hoelzinger, D.B., and Berens, M.E. (2007).  
546 Molecular targets of glioma invasion. *Cell Mol Life Sci* 64, 458-478.
- 547 Nakamura, T., Funahashi, M., Takagaki, K., Munakata, H., Tanaka, K., Saito, Y., and Endo, M.  
548 (1997). Effect of 4-methylumbelliferone on cell-free synthesis of hyaluronic acid.  
549 *Biochem Mol Biol Int* 43, 263-268.
- 550 Ngo, M., and Harley, B. (2018). Perivascular signals alter global genomic profile of glioblastoma  
551 and response to temozolomide in a gelatin hydrogel. *bioRxiv*.
- 552 Park, J.B., Kwak, H.-J., and Lee, S.-H. (2008). Role of hyaluronan in glioma invasion. *Cell*  
553 *Adhesion & Migration* 2, 202-207.
- 554 Paw, I., Carpenter, R.C., Watabe, K., Debinski, W., and Lo, H.W. (2015). Mechanisms  
555 regulating glioma invasion. *Cancer Lett* 362, 1-7.
- 556 Pedron, S., Becka, E., and Harley, B.A. (2013a). Regulation of glioma cell phenotype in 3D  
557 matrices by hyaluronic acid. *Biomaterials* 34, 7408-7417.
- 558 Pedron, S., Becka, E., and Harley, B.a.C. (2013b). Regulation of glioma cell phenotype in 3D  
559 matrices by hyaluronic acid. *Biomaterials* 34, 7408-7417.
- 560 Pedron, S., Becka, E., and Harley, B.a.C. (2015). Spatially-graded hydrogel platform as a  
561 three-dimensional engineered tumor microenvironment. *Adv Mater* 27, 1567-1572.
- 562 Pedron, S., Hanselman, J.S., Schroeder, M.A., Sarkaria, J.N., and Harley, B.a.C. (2017a).  
563 Extracellular hyaluronic acid influences the efficacy of EGFR tyrosine kinase inhibitors  
564 in a biomaterial model of glioblastoma. *Adv Healthc Mater* 6, 1700529.
- 565 Pedron, S., Polishetty, H., Pritchard, A.M., Mahadik, B.P., Sarkaria, J.N., and Harley, B.a.C.  
566 (2017b). Spatially-graded hydrogels for preclinical testing of glioblastoma anticancer  
567 therapeutics. *MRS Commun* 7, 442-449.

- 568 Quirico-Santos, T., Fonseca, C.O., and Lagrota-Candido, J. (2010). Brain sweet brain:  
569 importance of sugars for the cerebral microenvironment and tumor development.  
570 *Arquivos de Neuro-Psiquiatria* 68, 799-803.
- 571 Rankin, K.S., and Frankel, D. (2016). Hyaluronan in cancer - from the naked mole rat to  
572 nanoparticle therapy. *Soft Matter* 12, 3841-3848.
- 573 Rape, A., Ananthanarayanan, B., and Kumar, S. (2014). Engineering Strategies to Mimic the  
574 Glioblastoma Microenvironment. *Advanced drug delivery reviews* 0, 172-183.
- 575 Sarkaria, J.N., Carlson, B.L., Schroeder, M.A., Grogan, P., Brown, P.D., Giannini, C., Ballman,  
576 K.V., Kitange, G.J., Guha, A., Pandita, A., and James, C.D. (2006). Use of an orthotopic  
577 xenograft model for assessing the effect of epidermal growth factor receptor  
578 amplification on glioblastoma radiation response. *Clin Cancer Res* 12, 2264-2271.
- 579 Sarkaria, J.N., Yang, L., Grogan, P.T., Kitange, G.J., Carlson, B.L., Schroeder, M.A., Galanis,  
580 E., Giannini, C., Wu, W., Dinca, E.B., and James, C.D. (2007). Identification of  
581 molecular characteristics correlated with glioblastoma sensitivity to EGFR kinase  
582 inhibition through use of an intracranial xenograft test panel. *Mol Cancer Ther* 6, 1167-  
583 1174.
- 584 Sivakumar, H., Strowd, R., and Skardal, A. (2017). Exploration of Dynamic Elastic Modulus  
585 Changes on Glioblastoma Cell Populations with Aberrant EGFR Expression as a  
586 Potential Therapeutic Intervention Using a Tunable Hyaluronic Acid Hydrogel Platform.  
587 *Gels* 3.
- 588 Stern, R. (2008). Hyaluronidases in cancer biology. *Semin Cancer Biol* 18, 275-280.
- 589 Stupp, R., Mason, W.P., Van Den Bent, M.J., Weller, M., Fisher, B., Taphoorn, M.J.B.,  
590 Belanger, K., Brandes, A.A., Marosi, C., Bogdahn, U., Curschmann, J., Janzer, R.C.,  
591 Ludwin, S.K., Gorlia, T., Allgeier, A., Lacombe, D., Cairncross, J.G., Eisenhauer, E.,  
592 and Mirimanoff, R.O. (2005). Radiotherapy plus Concomitant and Adjuvant  
593 Temozolomide for Glioblastoma. *New England Journal of Medicine* 352, 987-996.
- 594 Syková, E. (2002). "Plasticity of Extracellular Space," in *The Neuronal Environment: Brain*  
595 *Homeostasis in Health and Disease*, ed. W. Walz. (Totowa, NJ: Humana Press), 57-81.
- 596 Tofuku, K., Yokouchi, M., Murayama, T., Minami, S., and Komiya, S. (2006). HAS3-related  
597 hyaluronan enhances biological activities necessary for metastasis of osteosarcoma cells.  
598 *Int J Oncol* 29, 175-183.
- 599 Toole, B.P. (2004). Hyaluronan: from extracellular glue to pericellular cue. *Nat Rev Cancer* 4,  
600 528-539.
- 601 Toole, B.P., Ghatak, S., and Misra, S. (2008). Hyaluronan oligosaccharides as a potential  
602 anticancer therapeutic. *Curr Pharm Biotechnol* 9, 249-252.
- 603 Umesh, V., Rape, A.D., Ulrich, T.A., and Kumar, S. (2014). Microenvironmental Stiffness  
604 Enhances Glioma Cell Proliferation by Stimulating Epidermal Growth Factor Receptor  
605 Signaling. *PLOS ONE* 9, e101771.
- 606 Wang, C., Tong, X., and Yang, F. (2014). Bioengineered 3D Brain Tumor Model To Elucidate  
607 the Effects of Matrix Stiffness on Glioblastoma Cell Behavior Using PEG-Based  
608 Hydrogels. *Molecular Pharmaceutics* 11, 2115-2125.
- 609 Wen, P.Y., and Kesari, S. (2008). Malignant gliomas in adults. *N Engl J Med* 359, 492-507.
- 610 West, D.C., Hampson, I.N., Arnold, F., and Kumar, S. (1985). Angiogenesis induced by  
611 degradation products of hyaluronic acid. *Science* 228, 1324-1326.
- 612 Wiranowska, M.R., and Rojiani, M.V. (2011). *Extracellular Matrix Microenvironment in*  
613 *Glioma Progression*. InTech.

- 614 Xie, Q., Mittal, S., and Berens, M.E. (2014). Targeting adaptive glioblastoma: an overview of  
615 proliferation and invasion. *Neuro-Oncology* 16, 1575-1584.
- 616 Zhao, Y.-F., Qiao, S.-P., Shi, S.-L., Yao, L.-F., Hou, X.-L., Li, C.-F., Lin, F.-H., Guo, K.,  
617 Acharya, A., Chen, X.-B., Nie, Y., and Tian, W.-M. (2017). Modulating Three-  
618 Dimensional Microenvironment with Hyaluronan of Different Molecular Weights Alters  
619 Breast Cancer Cell Invasion Behavior. *ACS Applied Materials & Interfaces* 9, 9327-  
620 9338.
- 621
- 622



623 **Figures**

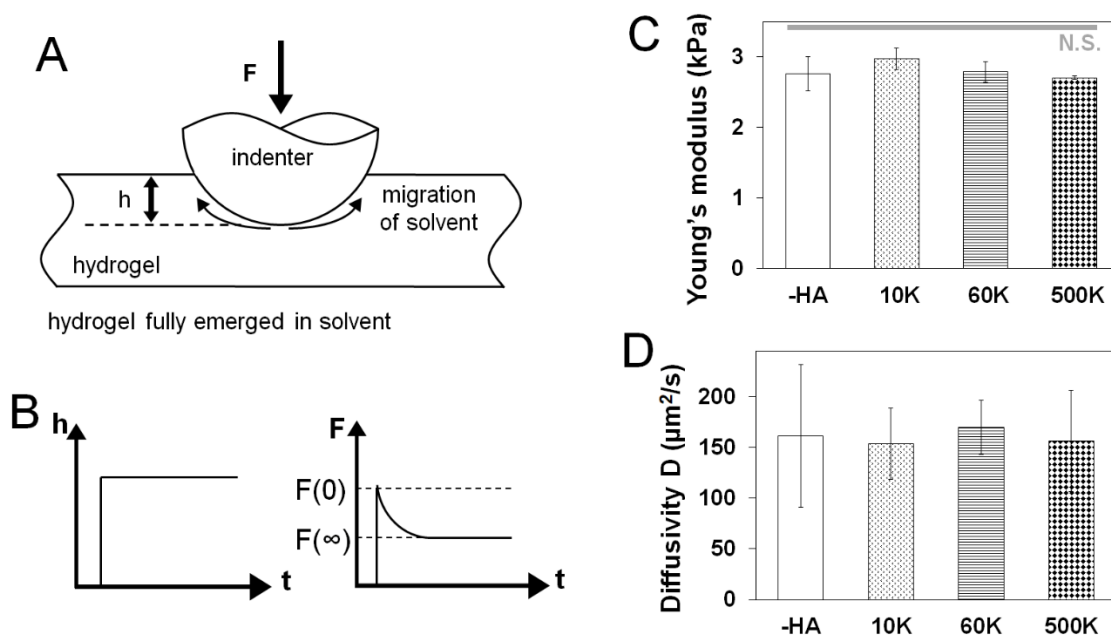

624  
625 **Figure 1.** (A) Schematic drawing of measuring hydrogel water diffusivity via AFM. (B)  
626 Poroelastic parameters are extracted via indentation performed to a fixed depth followed by force  
627 relaxation to a new equilibrium state. Characterization that for a homologous series of GelMA  
628 hydrogels developed for this project there was a negligible effect of the molecular weight of  
629 hyaluronic acid incorporated into the GelMA hydrogel on (C) hydrogel Young's modulus  
630 measured via MTS (n=6) and (D) hydrogel diffusivity via AFM (n=6).  
631

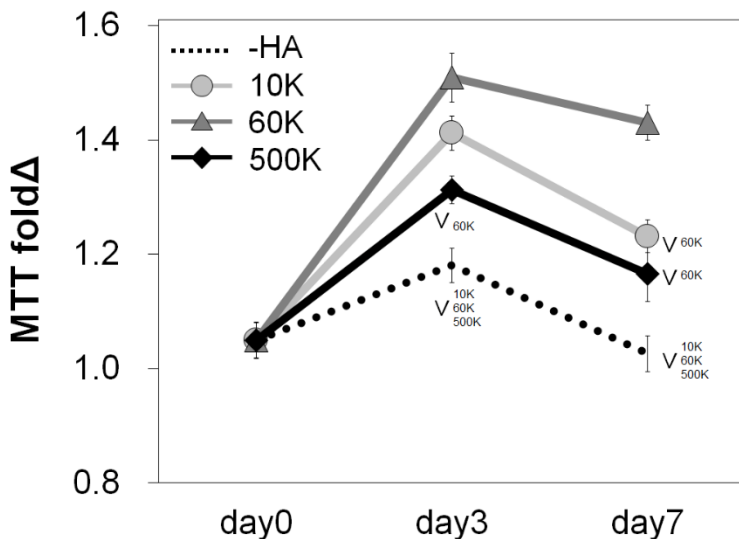

632  
633 **Figure 2.** Overall metabolic activities (n=3) of GBM seeded GelMA hydrogels as a function of  
634 incorporated hyaluronic acid molecular weight. Results are provided throughout the 7-day  
635 culture and are normalized to the metabolic activity of each group at day 0. Samples containing  
636 matrix-bound HA showed an overall higher metabolic activity compare to GelMA only (-HA)  
637 hydrogels. The greatest metabolic activity was observed for GelMA hydrogels containing 60  
638 kDa (60K) HA. <sup>v</sup> p < 0.05 significant decrease between groups.  
639

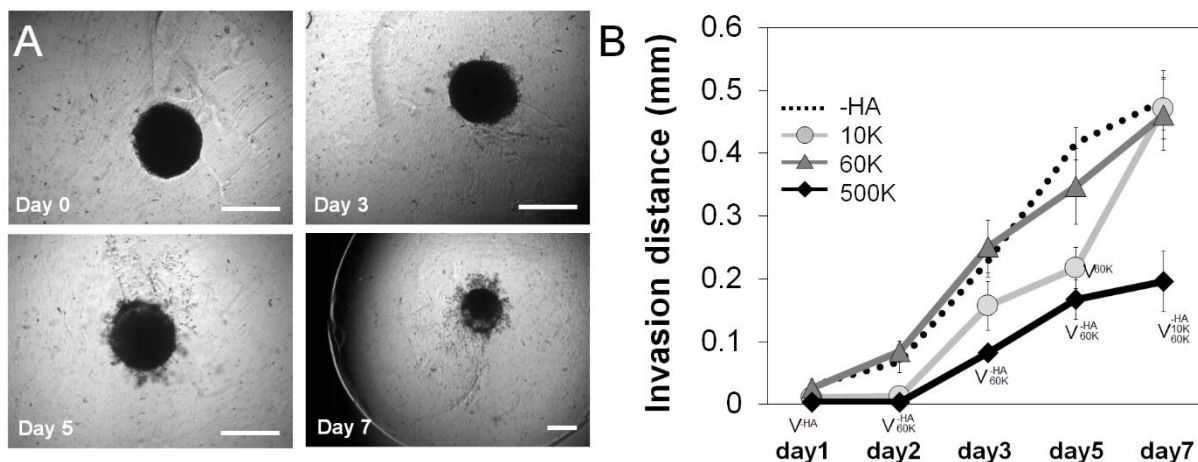

640  
641 **Figure 3.** (A) PDX invasion (n=6) into the surrounding hydrogel was quantified via a spheroid  
642 assay throughout the 7-day culture period. Representative images of spheroid invasion  
643 throughout the seven day culture, showing GBM cells progressively leave the spheroid and  
644 invade the hydrogel. Scale bar 0.5 mm. (B) Quantification of GBM cell invasion into the GelMA  
645 hydrogel as a function of the molecular weight of matrix immobilized HA. GelMA only (-HA)  
646 and GelMA hydrogels containing 60 kDa (60K) HA showed the greatest levels of invasion, with  
647 no significant difference between those groups across the culture period. Interestingly, GelMA  
648 hydrogels containing high molecular weight HA (500K) showed significantly reduced invasion.  $\checkmark$   
649  $p < 0.05$  significant decrease between groups.  
650

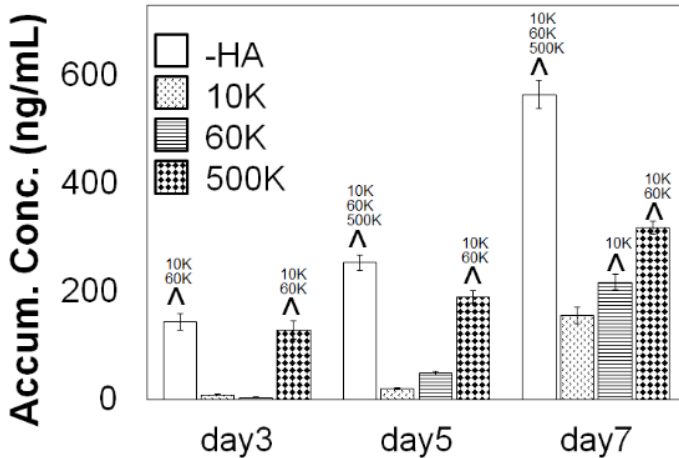

651  
652 **Figure 4.** Accumulative of soluble HA in the media over the course of GBM culture in GelMA  
653 hydrogels, measured via ELISA (n=3). GBM cells in GelMA hydrogels lacking any matrix  
654 immobilized HA (-HA) showed secreted significantly higher amount of soluble HA compare to  
655 GBM cells cultured within GelMA hydrogels containing matrix-bound HA. Production of  
656 soluble HA by GBM cells in GelMA hydrogels containing matrix-immobilized HA were  
657 strongly sensitive to the molecular weight of the matrix immobilized HA. Notably, soluble HA  
658 secretion increased with the MW of immobilized HA, with the 500K group secreting  
659 significantly higher amount of soluble HA compare to 60K and 10K. ^ p < 0.05 significant  
660 increase between different groups.  
661

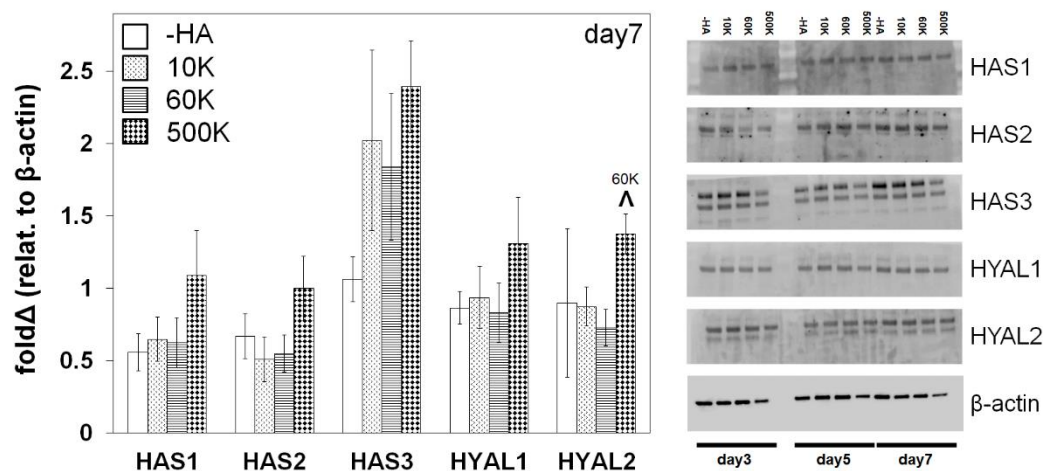

662  
663 **Figure 5.** Hyaluronan synthase (HAS) and hyaluronidase (HYAL) protein expression of GBM  
664 cells in gelatin hydrogels as a function of matrix immobilized HA molecular weight, analyzed  
665 via Western Blot at day 7 (n=3).  $\beta$ -actin is used as loading control. ^  $p < 0.05$  significant increase  
666 between different groups.  
667

## Tables

**Table 1.** Hydrogel composition and characterization results (n=6).

| <b>Hydrogel</b>                       | <b>-HA</b>     | <b>10K</b>     | <b>60K</b>     | <b>500K</b>    |
|---------------------------------------|----------------|----------------|----------------|----------------|
| <b>GelMA (wt%)</b>                    | 4.0            | 3.4            | 3.4            | 3.4            |
| <b>HAMA (wt%)</b>                     | 0              | 0.6            | 0.6            | 0.6            |
| <b>HA sodium salt MW</b>              | N/A            | ~ 10 kDa       | ~ 60 kDa       | ~ 500 kDa      |
| <b>LAP (wt%)</b>                      | 0.1            | 0.02           | 0.02           | 0.02           |
| <b>Young's Modulus (kPa)</b>          | 2.76 ± 0.24    | 2.97 ± 0.15    | 2.79 ± 0.15    | 2.70 ± 0.03    |
| <b>Diffusivity (μm<sup>2</sup>/s)</b> | 161.04 ± 70.33 | 153.54 ± 34.92 | 169.90 ± 26.88 | 156.43 ± 50.18 |
